# Supplementary material for: Application of Amberlite IRA 402 Resin Adsorption and Laccase Treatment for Acid Blue 113 Removal from Aqueous Media
Source: MDPI journal article supplement (doi:10.3390/polym13223991), 2021-11-18
Supplement: s1 [file s1]

# Application of Amberlite IRA 402 resin Adsorption and Laccase Treatment for Acid Blue 113 Removal from Aqueous Media

Nicoleta Mirela Marin<sup>1\*</sup> and Ioana Stanculescu<sup>2-4\*</sup>

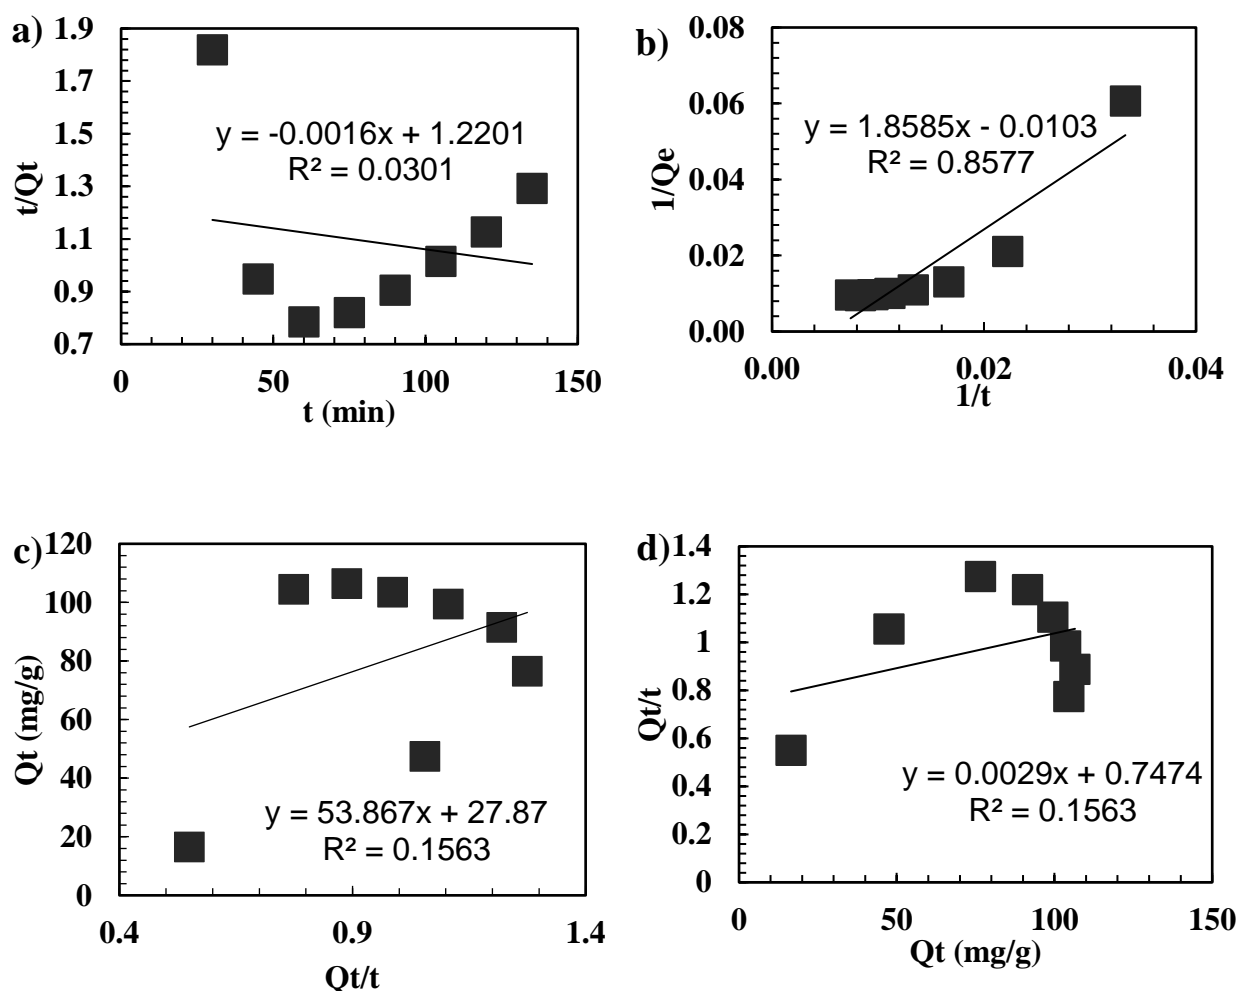

Figure S1. Fitting kinetics results for PSO models modulated as:  $t/Q_t$  vs  $t$  (a);  $1/Q_t$  vs  $1/t$  (b);  $Q_t$  vs  $Q_t/t$  (c) and  $Q_t/t$  vs  $Q_t$  (d)
